# Supplementary material
Source: PubMed Central journal article supplement (PMC6312005)
Supplement: 2018_205989-Disclosures_and_Contributions.pdf [file 2018_205989-Disclosures_and_Contributions.pdf]

Haematologica  
HAEMATOL/2018/205989  
Version 1

New insights into the causes of thrombotic events in patients with myeloproliferative neoplasms raises the possibility for novel therapeutic approaches

Michal Bar-Natan and Ronald Hoffman

Disclosures: MB no COI RH no COI

Contributions: MB and RH wrote the editorial
